# Supplementary material for: Unconditional Cash Transfers and Maternal Assessments of Children's Health, Nutrition, and Sleep: A Randomized Clinical Trial
Source: PubMed Central journal article supplement (PMC10543132; doi:10.1001/jamanetworkopen.2023.35237), 2023-09-29
Supplement: jamanetwopen-e2335237-s003.pdf [file jamanetwopen-e2335237-s003.pdf]

## Data Sharing Statement

Sperber. Unconditional Cash Transfers and Maternal Assessments of Children's Health, Nutrition, and Sleep. *JAMA Netw Open*. Published September 22, 2023.

doi:10.1001/jamanetworkopen.2023.35237

### Data

**Data available:** Yes

**Data types:** Deidentified participant data

**How to access data:** <https://www.icpsr.umich.edu/web/DSDR/studies/37871/versions/V3>

**When available:** With publication

### Supporting Documents

**Document types:** None

### Additional Information

**Who can access the data:** Data is publicly available. Analytic code will be provided upon request

**Types of analyses:** Data is publicly available

**Mechanisms of data availability:** Data is publicly available
